# Supplementary material
Source: MDPI journal article supplement (https://www.mdpi.com/2073-4441/15/1/60)
Supplement: s1 [file s1]

Archive with 3 entries (3 files):
- Figures.pdf
- Table S1.xlsx
- Table S2.xlsx
