# Supplementary material
Source: MDPI journal article supplement (https://www.mdpi.com/2073-4441/15/1/60)
Supplement: s1 [file s1 › Figures.pdf]

## Supplementary Materials

**Figure S1.** Example of polygon obtained by Google Earth used for measurements of shoreline length of lakes.

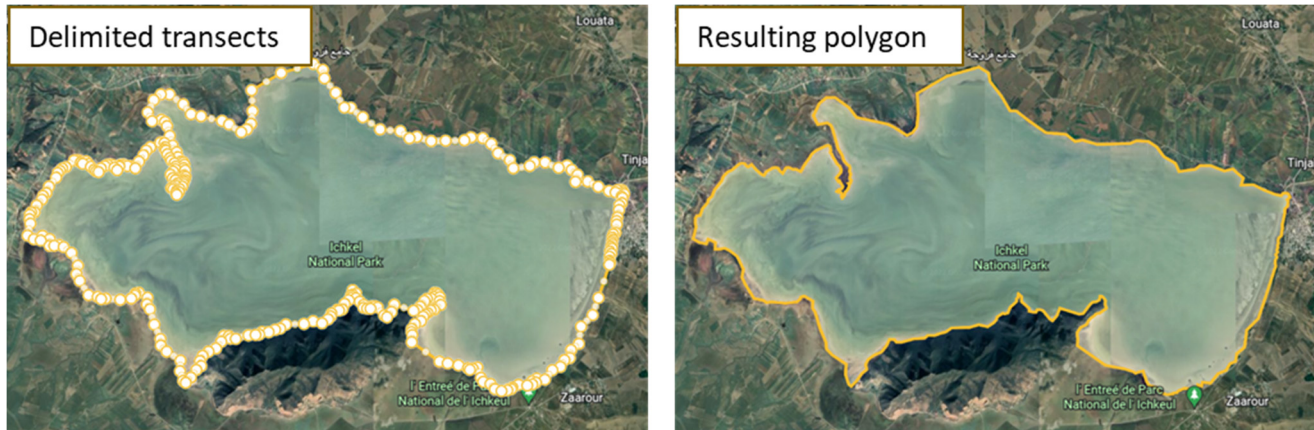

**Figure S2. PRISMA 2020 flow diagram for new systematic reviews which included searches of databases and registers only**

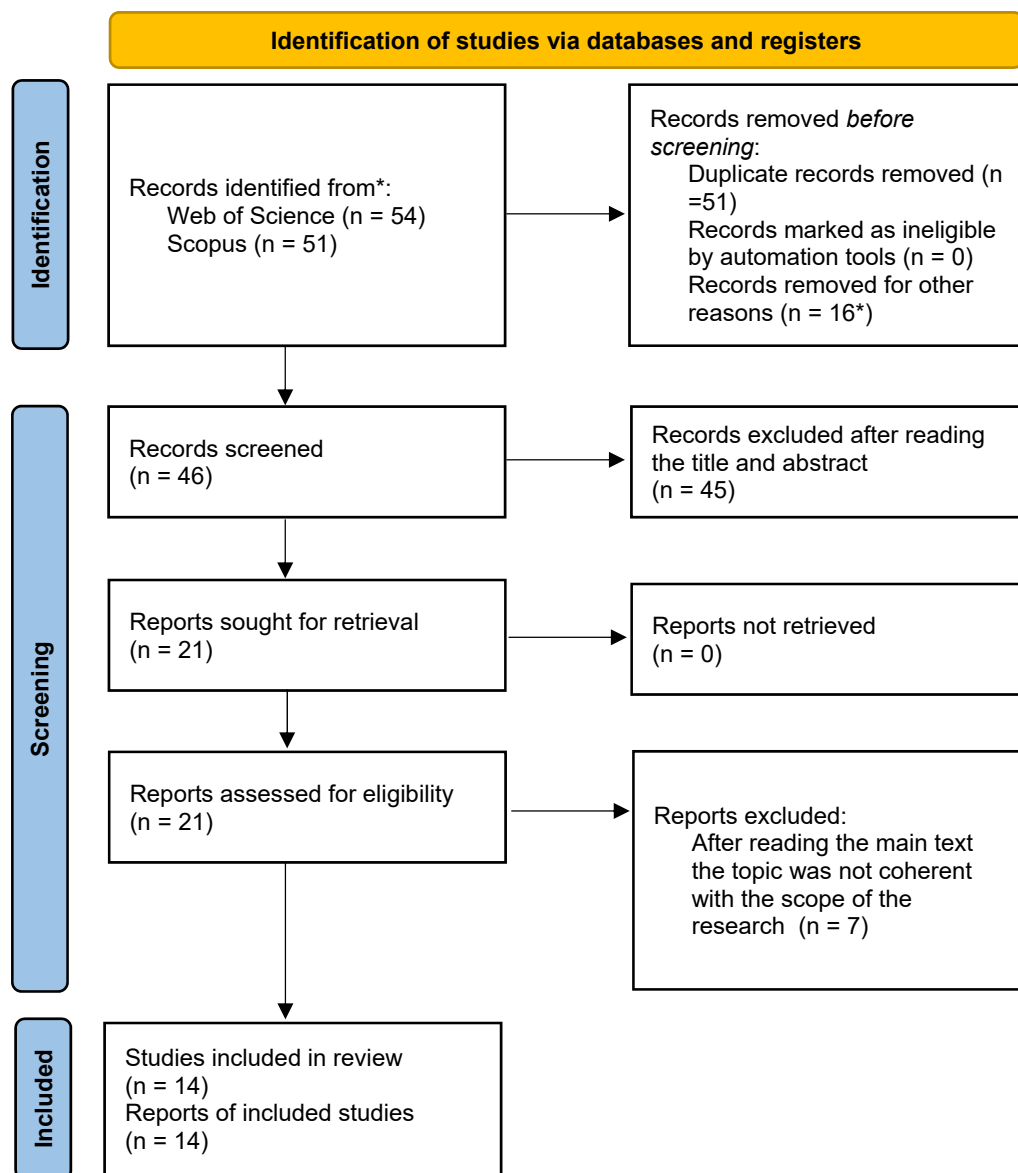

\*Book chapters and reviews were removed

#### Reference

Page MJ, McKenzie JE, Bossuyt PM, Boutron I, Hoffmann TC, Mulrow CD, et al. The PRISMA 2020 statement: an updated guideline for reporting systematic reviews. *BMJ* 2021;372:n71. doi: 10.1136/bmj.n71

For more information, visit: <http://www.prisma-statement.org/>
