# Supplementary material
Source: MDPI journal article supplement (https://www.mdpi.com/2073-4441/15/1/60)
Supplement: s1 [file s1 › Table S1.xlsx]

## Sheet: Foglio1
ITEM DESCRIPTION IN REVIEWED ARTICLES	CATEGORY IN UNEP/IOC Guidelines on Survey and Monitoring of Marine Litter
Bags	PL07
Beverage bottles	PL02
Bottle cap	PL01
Cellophane bags	PL14
Foam food containers	FP04
Food wrapper	PL06
Packaging material	FP04
Packing material/ plastic bottles	PL02/FP04
Packing material/ plastic bottles	PL02/FP04
Plastic bag	PL07
Plastic bottle	PL02
Plastic canisters	LP19
Synthetic clothes /fishing nets	PL18/PL20
Synthetic clothes /fishing nets	PL19/PL20
Synthetic clothes /fishing nets /plastic canister /plastic plates and dishes	PL03/PL04/PL19/PL20
