# Supplementary material
Source: MDPI journal article supplement (https://www.mdpi.com/2073-4441/15/1/60)
Supplement: s1 [file s1 › Table S2.xlsx]

## Sheet: Foglio1
Authors	Geographical area	Lake	Country	Lake type	Shoreline length (km)	Transect length (km)	=transect/shoreline (%)
Arturo, IA; Corcoran, PL	North America	Lake Superior	Canada/USA	Glacial	2938	min 0,09 max 0,18	min 1E-01 max 9E-02				TRANSECT	TRANSECT/SHORELINE LENGTH
Arturo, IA; Corcoran, PL	North America	Lake Ontario	Canada/USA	Glacial	1146				km	Minimum	0.04	0.000630076
Arturo, IA; Corcoran, PL	North America	Lake Michigan	USA	Glacial	2633					Maximum	0.95	100
Arturo, IA; Corcoran, PL	North America	Lake Erie	Canada/USA	Glacial	1370					Median	0.435	0.120482
Arturo, IA; Corcoran, PL	North America	Lake Huron	Canada/USA	Glacial	6157					Standard deviation	0.328302	46.5791
Blettler M.C.M., Ulla M.A., Rabuffetti A.P., Garello N.	South America	Lake Setúbal	Argentina	Floodplain	33	0.1	0.30303
Dalu T., Malesa B., Cuthbert R.N.	Africa	Nandoni Reservoir	South Africa	Reservoir	44	0.04	0.0909091
Egessa, R; Nankabirwa, A; Basooma, R; Nabwire, R	Africa	Lake Victoria	Uganda	Tectonic	7142	0.045	0.000630076
Faure F., Corbaz M., Baecher H., De Alencastro L.F.	Europe	Lake Geneva	Switzerland/France	Glacial	156	not available	not available
Ghaffari S., Bakhtiari A.R., Ghasempouri S.M., Nasrolahi A.	Asia	Caspian Sea	Iran	Tectonic	7000	0.096	0.00137143
Hengstmann, E; Fischer, EK	Europe	Lake Tollense	Germany	Glacial	25	0.435	1.74
Hengstmann, E; Weil, E; Wallbott, PC; Tamminga, M; Fischer, EK	Europe	Lake Tollense	Germany	Glacial	25	cannot be calculated	not available
Karnaukhov D., Biritskaya S., Dolinskaya E., Teplykh M., Silenko N., Ermolaeva Y., Silow E.	Asia	Lake Hovsgol	Mogolia	Tectonic	415	0.5	0.120482
Karnaukhov D., Biritskaya S., Dolinskaya E., Teplykh M., Silenko N., Ermolaeva Y., Silow E.	Asia	Lake Baikal	Russia	Tectonic	1800	0.5	0.0277778
Liu Y., Fang J.	Asia	Lake Dishui	China	Anthropogenic	5.3066	not available	not available
Merga, LB; Redondo-Hasselerharm, PE; Van den Brink, PJ; Koelmans, AA	Africa	Lake Ziway	Ethiopia	Tectonic	137	not available	not available
Vaughan R., Turner S.D., Rose N.L.	Europe	Edgbaston Pool	United Kindgom	Anthropogenic	1	not available	not available
Jaouani et alii	Africa	Ichkeul Lake	Tunisia	not reported	59	0.1	0.00169492
Czarkowski et alii	Europe	Lake Giławy	Poland	not reported	0.95	0.95	100
Czarkowski et alii	Europe	Lake ŁowneDuże	Poland	not reported	0.78	0.78	100
Czarkowski et alii	Europe	Lake Ustrych	Poland	not reported	0.69	0.69	100
